# Supplementary figures and images for: A tale of three next generation sequencing platforms: comparison of Ion torrent, pacific biosciences and illumina MiSeq sequencers
Source: Springer Nature journal article supplement (doi:10.1186/1471-2164-13-341), 2012-01-01

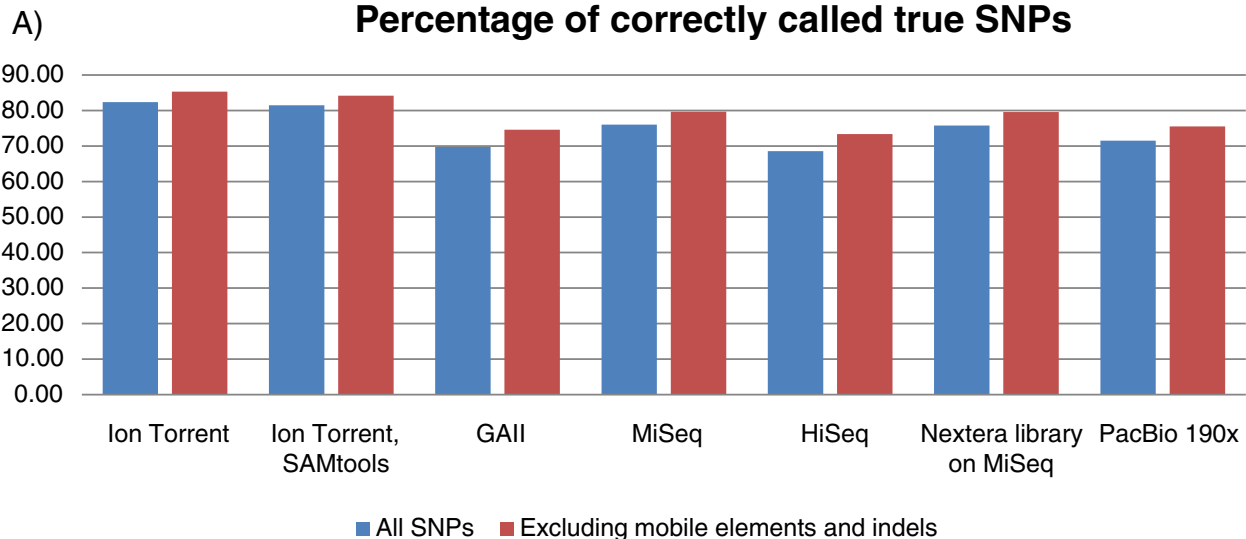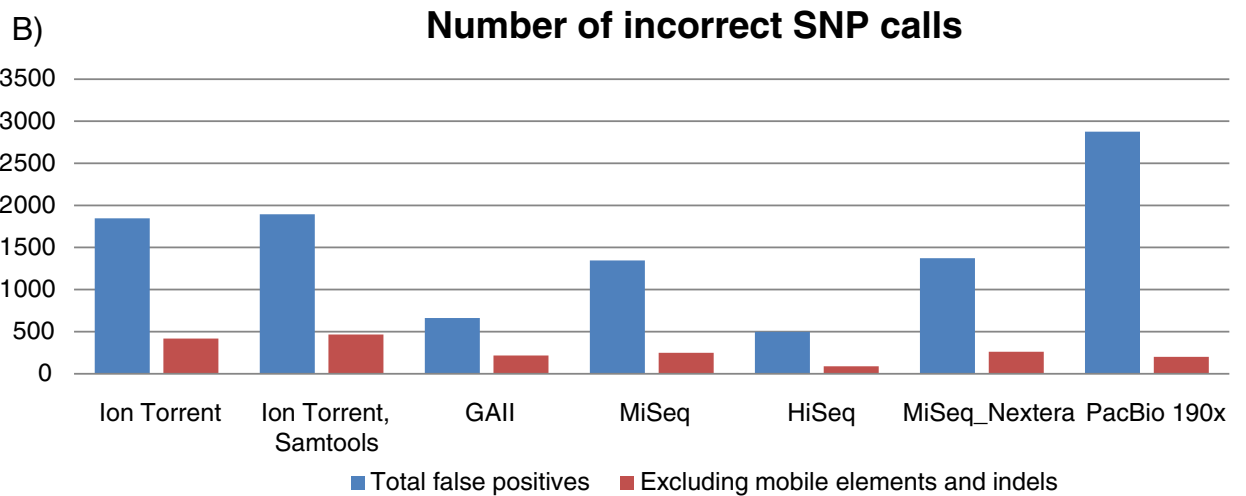

Supplement: 12864_2012_4127_MOESM10_ESM.pdf [file 12864_2012_4127_MOESM10_ESM.pdf]

A) — PacBio — PGM — GAI — HiSeq — Mlseq

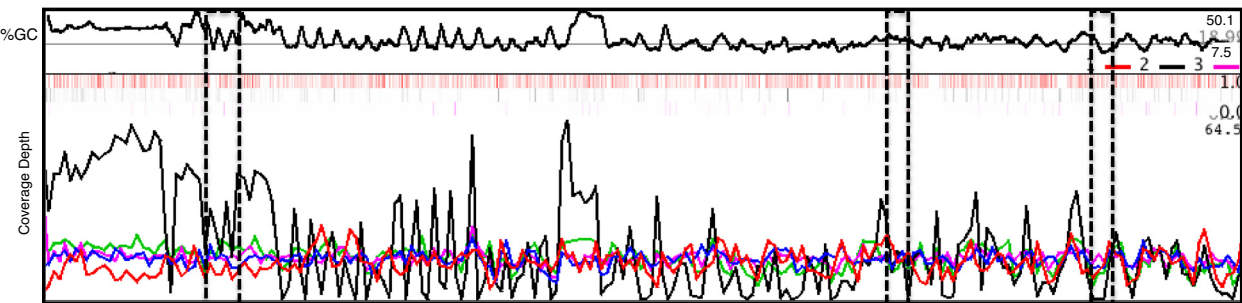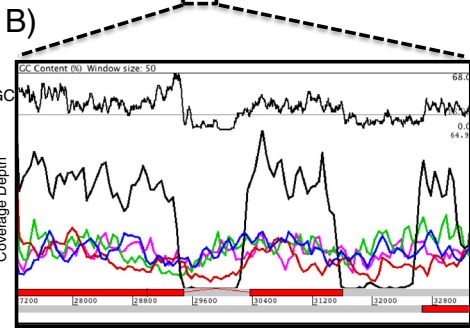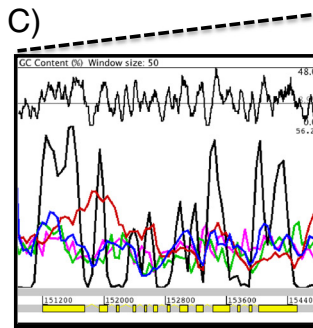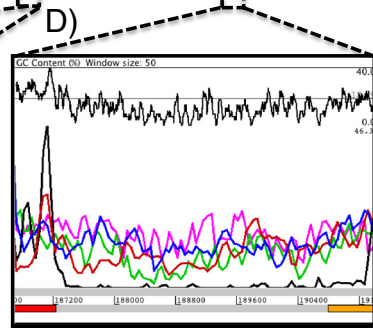

Supplement: 12864_2012_4127_MOESM7_ESM.pdf [file 12864_2012_4127_MOESM7_ESM.pdf]

A)

B)

C)

P

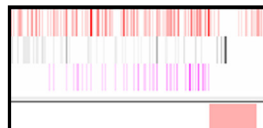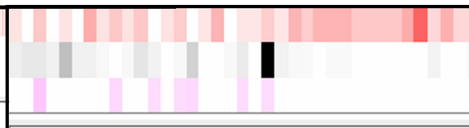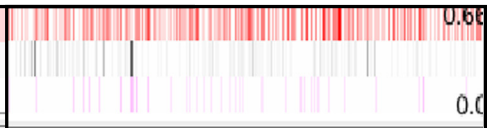

I

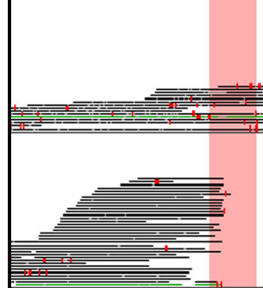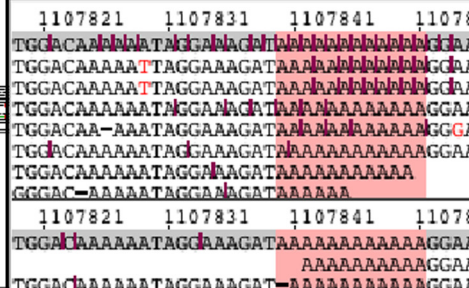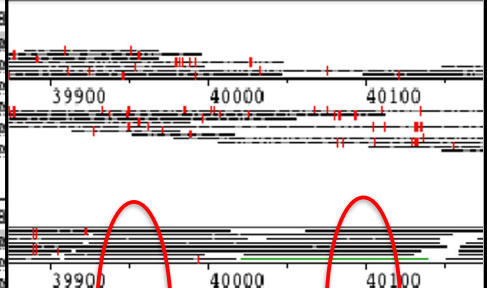

M

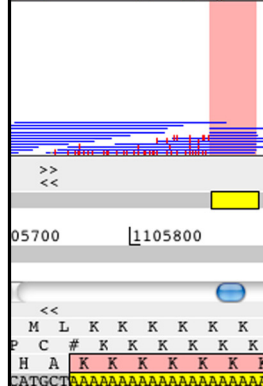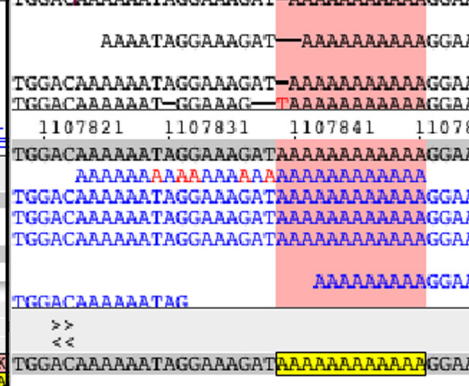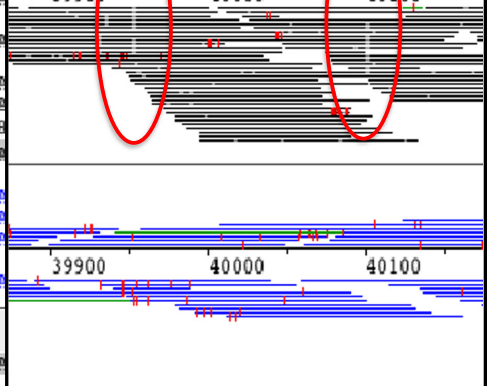

Supplement: 12864_2012_4127_MOESM9_ESM.pdf [file 12864_2012_4127_MOESM9_ESM.pdf]
